# Supplementary material for: Modulating the electronic structure of ternary transition metal phosphide for enhanced hydrogen evolution activity
Source: Royal Society of Chemistry journal article supplement (doi:10.1039/d2dt03083g), 2022-01-01
Supplement: d2dt03083g1.pdf [file d2dt03083g1.pdf]

1  
2  
3  
4  
5  
6  
7  
8  
9  
10  
11  
12  
13  
14  
15  
16  
17  
18  
19  
20  
21  
22  
23  
24  
25  
26  
27  
28  
29  
30

## Supporting Information

### **Modulating electronic structure of ternary transition metal phosphide for enhanced hydrogen evolution activity**

Sheying Dong<sup>a\*</sup>, Huangcong Tang<sup>a</sup>, Kangkang Wang<sup>a</sup>, Qian Zheng<sup>a</sup>, Tinglin Huang<sup>b</sup>

<sup>a</sup> *School of Chemistry and Chemical Engineering, Xi'an University of Architecture and  
Technology, Xi'an 710055, People's Republic of China*

<sup>b</sup> *School of Environmental and Municipal Engineering, Xi'an University of Architecture and  
Technology, Xi'an 710055, People's Republic of China*

Corresponding author E-mail address: [dongsyy@126.com](mailto:dongsyy@126.com)

31 **Electrochemical tests:**

32 All electrochemical measurements were investigated in a standard three-electrode  
33 configuration on the electrochemical workstation (CHI660B, Shanghai Chenhua  
34 Instrument Co., Ltd., China) with 0.5 M H<sub>2</sub>SO<sub>4</sub> used as the electrolyte in room  
35 temperature. The catalyst ink consists of a mixture of 5 mg catalyst powder, 800 μL  
36 deionized water, 150 μL ethanol, and 50 μL 0.5 wt% Nafion solution. Then the  
37 catalyst ink was under sonication for forty minutes. The black mixture ink was  
38 dropped onto the glassy carbon electrode in a mass loading of 0.354 mg/cm<sup>2</sup>, dry for  
39 several hours to ensure the catalyst powder did not fall easily before measurement. A  
40 double salt bridge calomel electrode and graphite rod were utilized as the reference  
41 and counter electrode, respectively. The hydrogen evolution reactions (HER)  
42 performance was measured by polarization curve, obtained from linear sweep  
43 voltammetry (LSV) at a scan rate of 5 mV/s with 95% *iR*-correction.

44 For all electrochemical measurements, the electrochemical potential values for the  
45 three-electrode system were analyzed with the following equation from *E* (SCE) to *E*  
46 (RHE)

47 
$$E (\text{vs. RHE}) = E (\text{vs. SCE}) + 0.2415 + 0.059 \times \text{pH}$$

48 Electrochemical impedance spectroscopy (EIS) was recorded at the overpotential of  
49 100 mV in a frequency range from 0.01 Hz to 100 kHz. The durability test of  
50 FeCoNiP@NCNTs was conducted with a chronoamperometric curve at a certain  
51 current density. Tafel plots are fitted to the Tafel equation:

52 
$$\eta = b \log j + a$$

53 where  $\eta$  is the overpotential,  $b$  is the Tafel slope,  $j$  is the current density and  $a$  is the  
54 Tafel intercept relative to the exchange current density  $j_0$ . The electrochemically  
55 active surface area (ECSA) was measured by Cyclic voltammetry (CV)-based  
56 electrochemical double layer capacitance ( $C_{dl}$ ) measurements at the range of 10-100  
57 mV s<sup>-1</sup>. The ECSA was calculated by the following equation:

$$58 \quad ECSA = \frac{C_{dl}}{40 \mu F cm^{-2}} cm_{ECSA}^2$$

### 59 **Computational method**

60 The equilibrium lattice constants of orthorhombic FeP unit cell were optimized,  
61 when using a 7×9×5 Monkhorst–Pack k-point grid for Brillouin zone sampling, to be  
62  $a=5.109 \text{ \AA}$ ,  $b= 3.011 \text{ \AA}$ ,  $a=5.725 \text{ \AA}$ . We then use it to construct a FeP (002) surface  
63 model (model 1) with  $p(1\times 3)$  periodicity in the x and y directions and 3 stoichiometric  
64 layers in the z direction separated by a vacuum layer in the depth of 15 Å in order to  
65 separate the surface slab from its periodic duplicates. This surface model contains 36  
66 Fe and 36 P atoms. In the the other model, Co and Ni atoms were doped into model 1  
67 by replacing one Fe atom on the outmost layer, respectively. During structural  
68 optimizations, the gamma point in the Brillouin zone was used for k-point sampling,  
69 and the bottom two stoichiometric layers were fixed while the top one was allowed to  
70 relax. We build a FeP (002) surface model (model 2) with  $p(2\times 2)$  periodicity in the x  
71 and y directions and 3 stoichiometric layers in the z direction separated by a vacuum  
72 layer in the depth of 15 Å in order to separate the surface slab from its periodic  
73 duplicates. model 2 contains 48 Fe and 48 P atoms. During structural optimizations,  
74 the gamma point in the Brillouin zone was used for k-point sampling, and the bottom

75 two stoichiometric layers were fixed while the top one was allowed to relax.

76 The free energy of a gas phase molecule or an adsorbate on the surface was  
77 calculated by the equation  $G = E + \text{ZPE} - TS$ , where E is the total energy, ZPE is the  
78 zero-point energy, T is the temperature in kelvin (298.15 K is set here), and S is the  
79 entropy.

80 The free energy of adsorption ( $G_{\text{ads}}$ ) of H atom was defined as

$$81 \quad G_{\text{ads}} = G_{H/\text{surf}} - G_{H_2(g)/2}$$

82 where  $G_{H/\text{surf}}$ ,  $G_{\text{surf}}$  and  $G_{H_2(g)/2}$  are the free energy of H adsorbed on the surface,  
83 the free energy of clean surface, and the free energy of isolated  $H_2$  molecule in a cubic  
84 periodic box with a side length of 20 Å and a  $1 \times 1 \times 1$  Monkhorst-Pack k-point grid for  
85 Brillouin zone sampling, respectively.

86

87

88

89

90

91

92

93

94

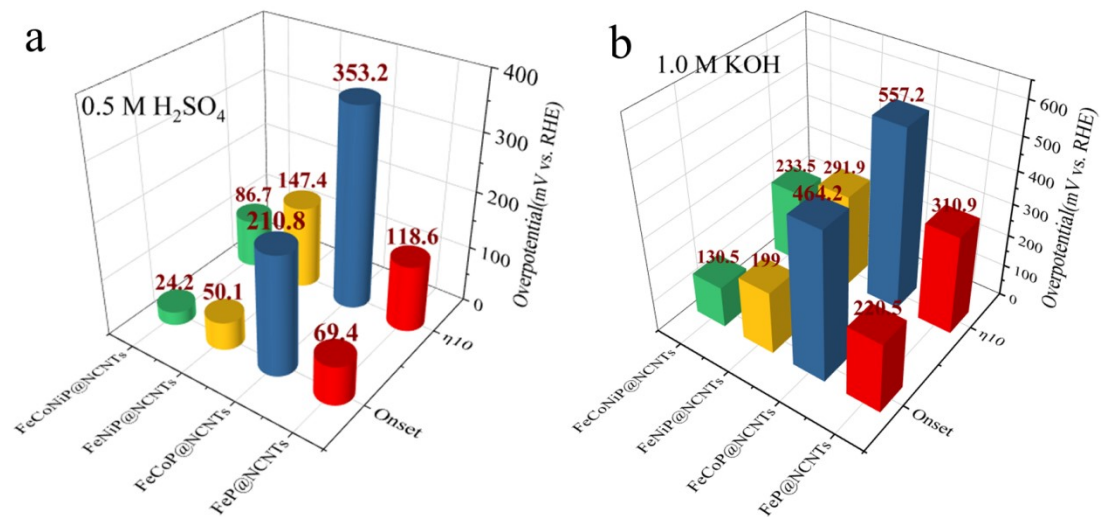

95

96

97 Fig. S1 The required overpotential at onset, and  $\eta_{10}$  of FeCoNiP@NCNTs in 0.5 M H<sub>2</sub>SO<sub>4</sub> (a) and

98

1 M KOH (b).

99

100

101

102

103

104

105

106

107

108

109

110

111

112

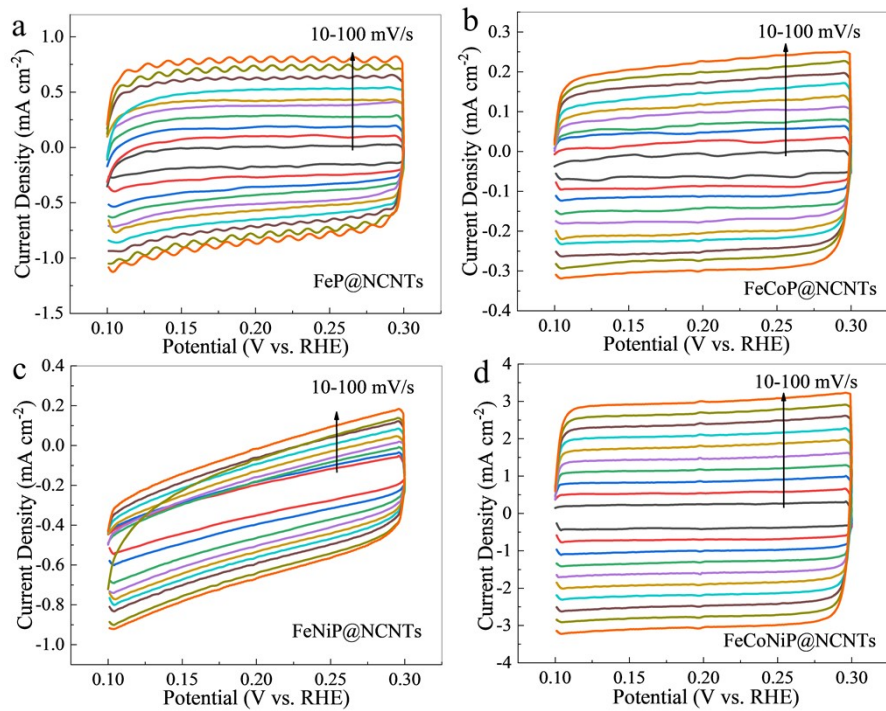

113  
 114 Fig. S2 The CV curves at different scan rates of (a) FeP@NCNTs, (b) FeCoP@NCNTs, (c)  
 115 FeNiP@NCNTs, and (d) FeCoNiP@NCNTs in 0.5 M H<sub>2</sub>SO<sub>4</sub>.

116  
 117  
 118  
 119  
 120  
 121  
 122

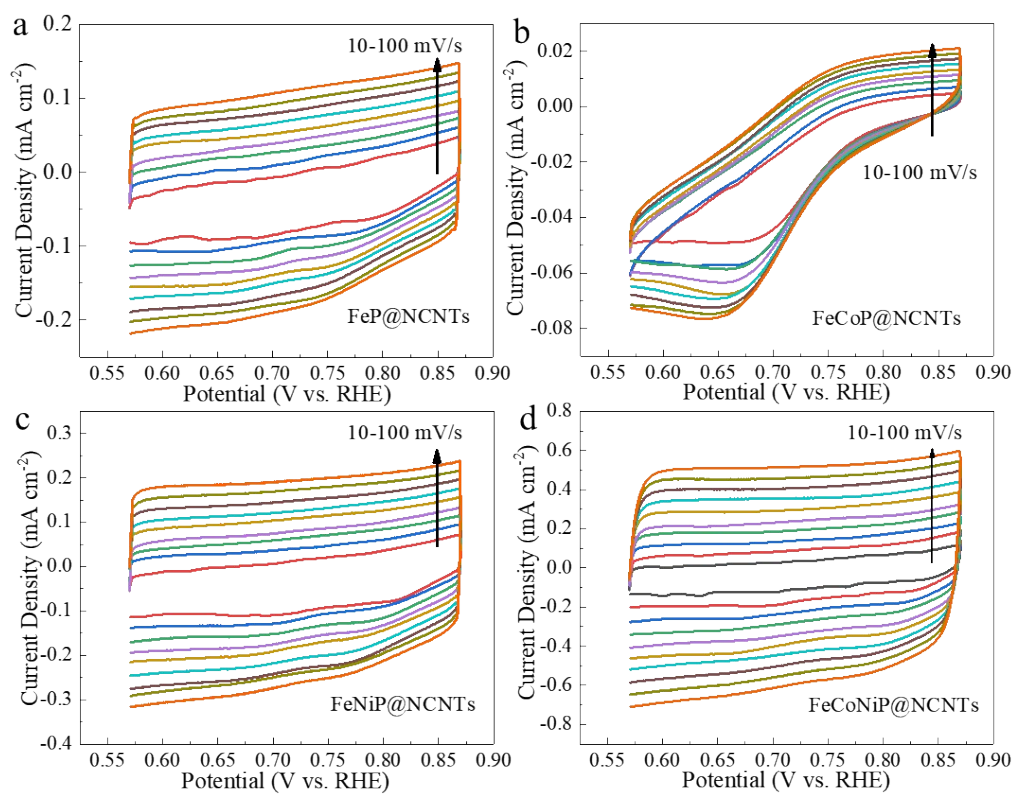

Fig. S3 The CV curves at different scan rates of (a) FeP@NCNTs, (b) FeCoP@NCNTs, (c) FeNiP@NCNTs, and (d) FeCoNiP@NCNTs in 1.0 M KOH.

123  
 124  
 125  
 126  
 127  
 128  
 129  
 130  
 131  
 132  
 133  
 134  
 135  
 136  
 137  
 138  
 139  
 140  
 141

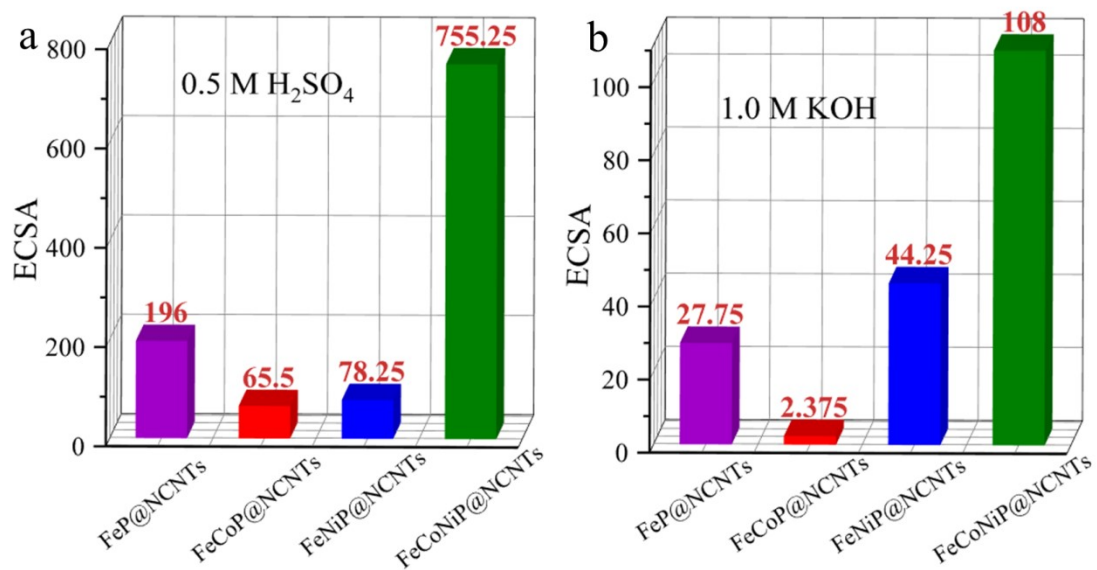

142  
 143  
 144 Fig. S4 ECSA of FeP@NCNTs, FeCoP@NCNTs, FeNiP@NCNTs, and FeCoNiP@NCNTs in 0.5  
 145 M H<sub>2</sub>SO<sub>4</sub> (a) and 1.0 M KOH (b).  
 146  
 147  
 148  
 149  
 150  
 151  
 152  
 153  
 154  
 155  
 156  
 157  
 158  
 159  
 160  
 161  
 162  
 163



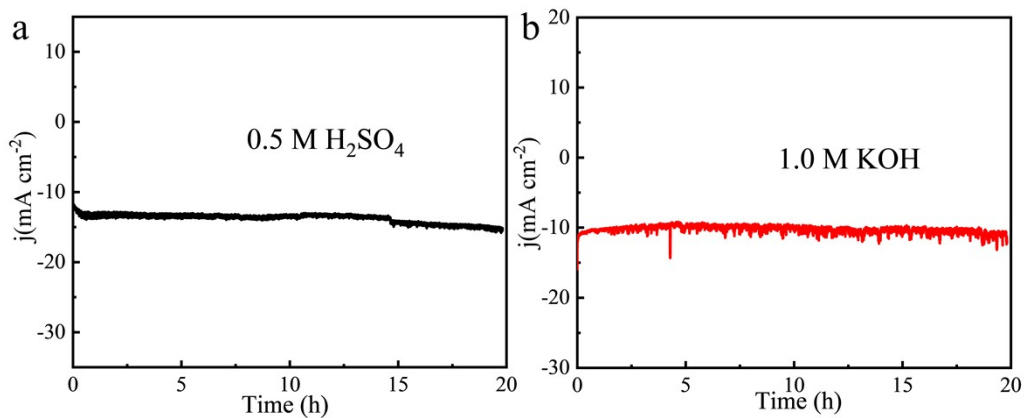

164

165

166 Fig. S5 Chronoamperometry of FeCoNiP@NCNTs in 0.5 M H<sub>2</sub>SO<sub>4</sub> (a) and 1.0 M KOH (b).

167

168

169

170

171

172

173

174

175

176

177

178

179

180

181

182

183

184

185

186

187

188

189

190

191

192

193

194

195

196

197

198

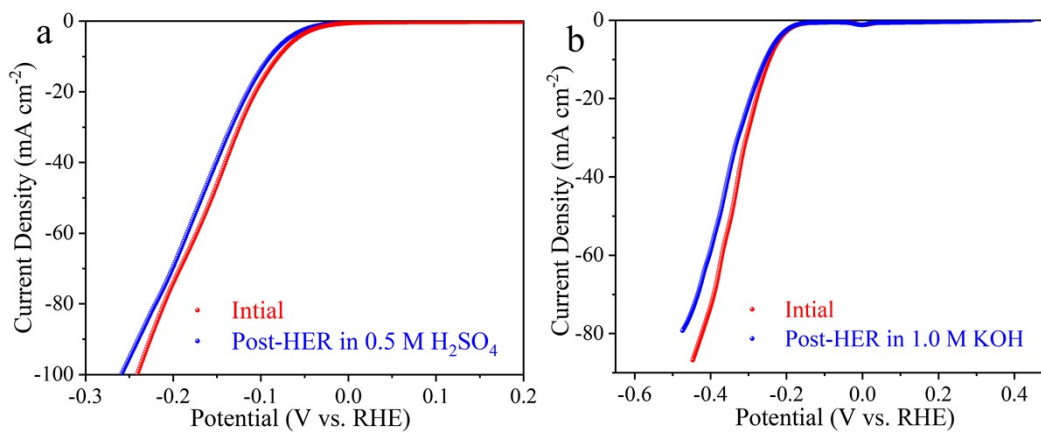

199

200

Fig. S6 LSV curves before and after stability tests in 0.5 M H<sub>2</sub>SO<sub>4</sub> and 1.0 M KOH.

201

202

203

204

205

206

207

208

209

210

211

212

213

214

215

216

217

218

219

220

221

222

223

224

225

226

227

228

229

230

231

232

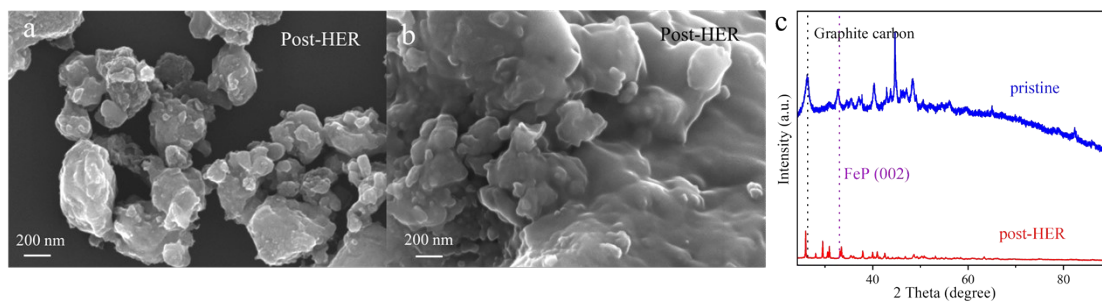

233

234 Fig. S7 The SEM images (a, b) and XRD pattern (c) of the post-HER FeCoNiP@NCNTs catalyst

235

after the stability test for 20 h at 10 mA cm<sup>-2</sup>.

236

237

238

239

240

241

242

243

244

245

246

247

248

249

250

251

252

253

254

255

256

257

258

259

260

261

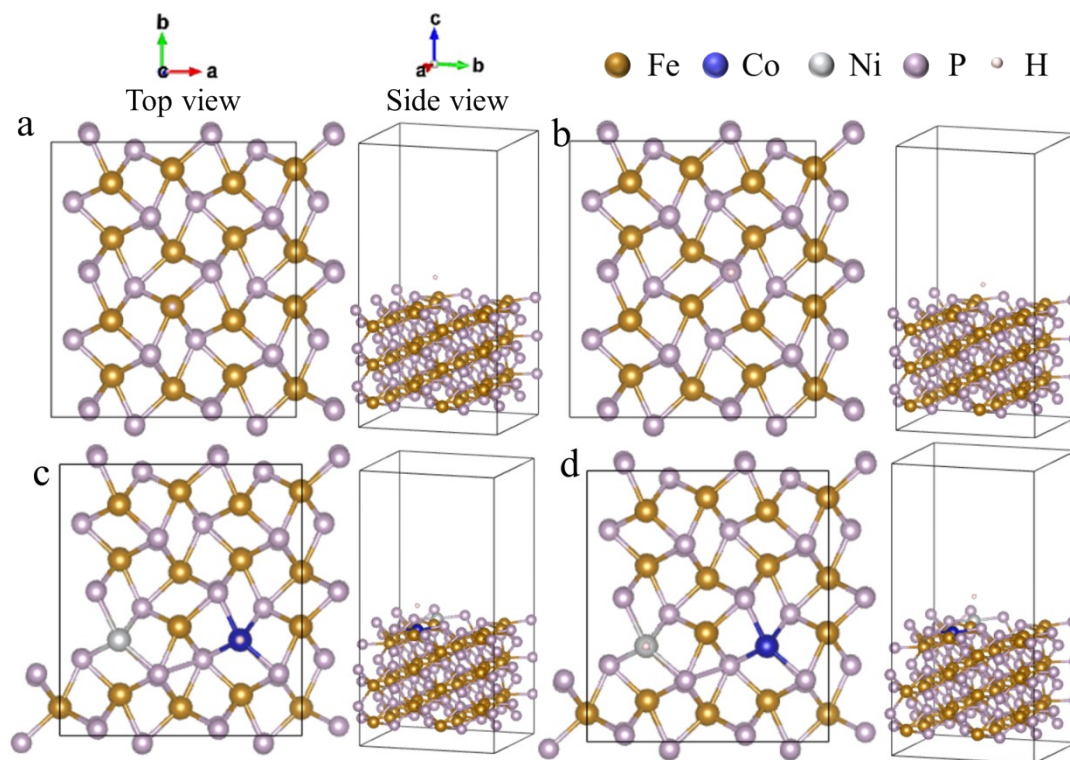

262

263

264 Fig. S8 Top and side view of (a, b) FeP (002) pristine structure and theoretical (c, d) Co/Ni doped

265 FeP (002) model (gold: Fe, purple: Co, silver: Ni, gray: P, and white: H) before the optimization

266

of hydrogen adsorption sites.

267

268

269

270

271

272

273

274

275

276

277

278

279

280

281

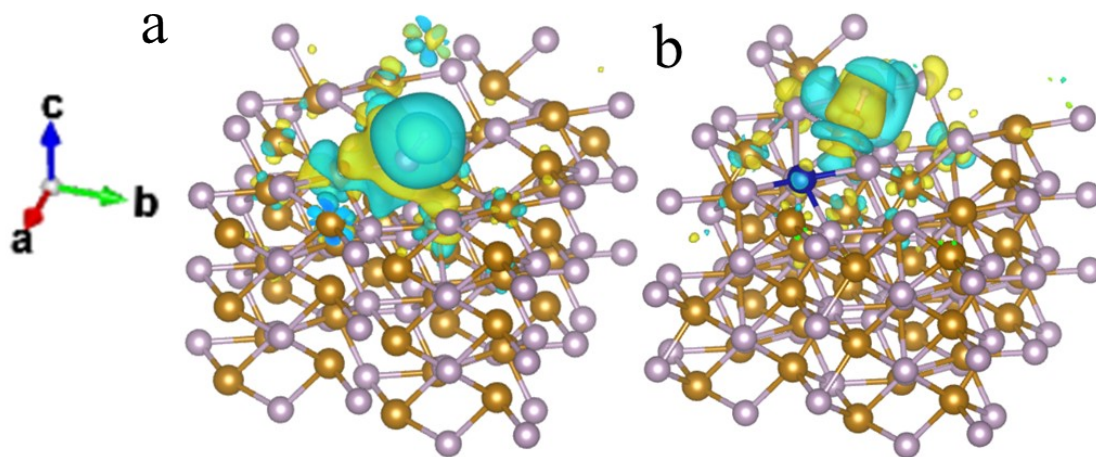

282  
283

284 Fig. S9 The view sides for Bader charge analysis of FeP (002) (a) and Co/Ni doped FeP (002) (b)  
285 with optimal hydrogen adsorption site.  
286

287  
288  
289  
290  
291  
292  
293  
294  
295  
296  
297  
298  
299  
300  
301  
302  
303  
304  
305  
306  
307  
308  
309  
310  
311  
312  
313  
314

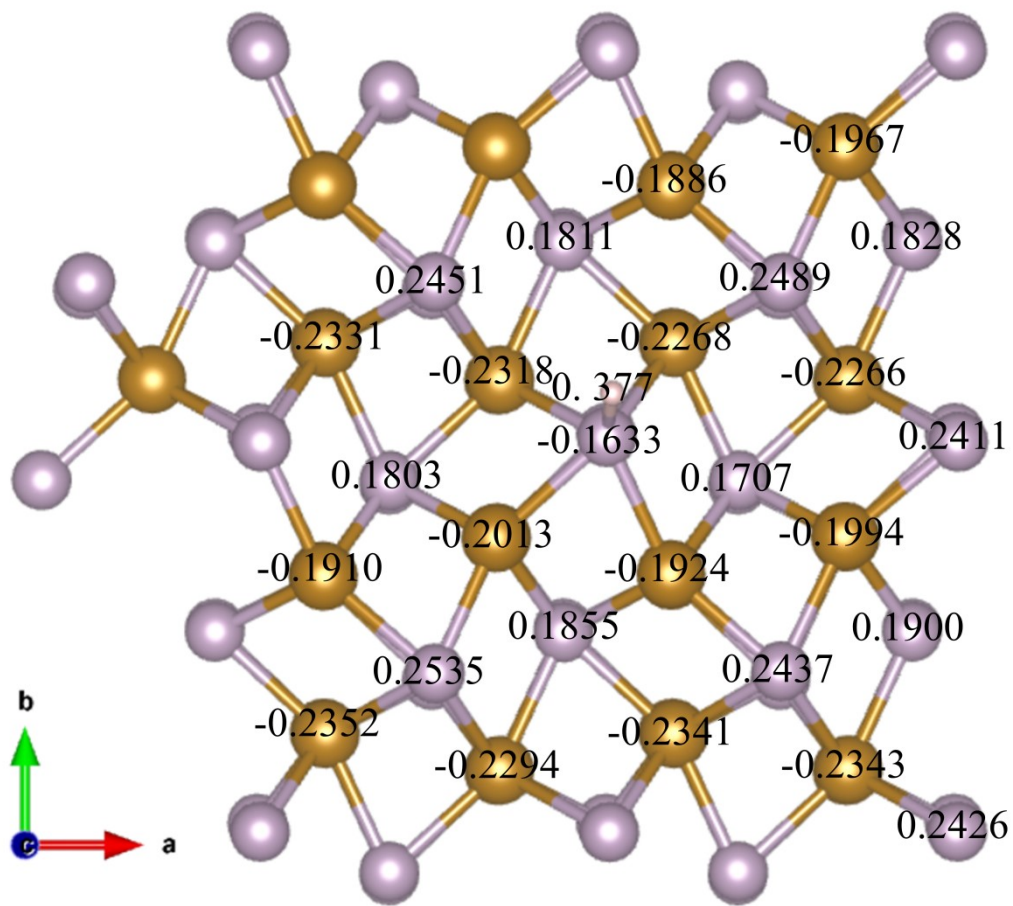

315  
316  
317

Fig. S10 The Bader charges of FeP (002).

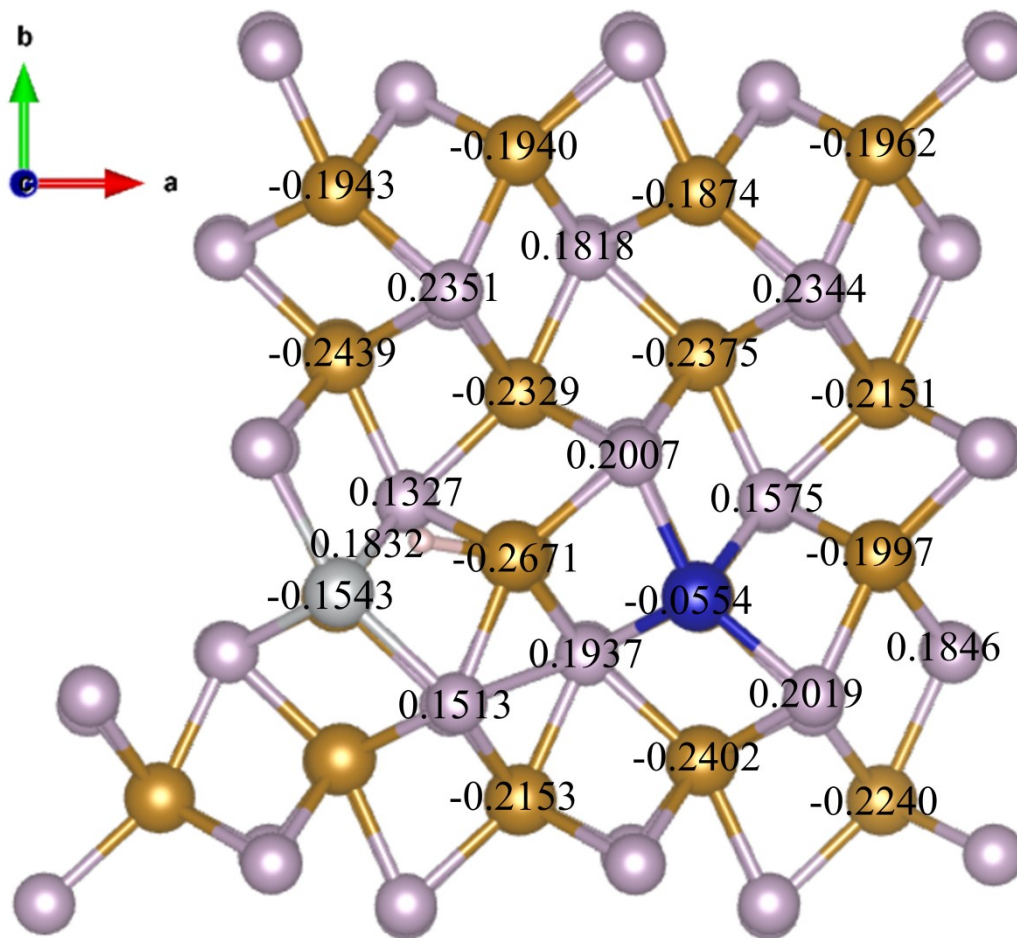

318  
 319  
 320  
 321  
 322  
 323  
 324  
 325  
 326  
 327  
 328  
 329  
 330  
 331  
 332  
 333  
 334  
 335  
 336  
 337  
 338

Fig. S11 The Bader charges of Co/Ni doped FeP (002).

339 Table S1. HER performance of catalysts with different ratios of dicyandiamide to FeCoNi-MOF-  
 340 100 in 0.5 M H<sub>2</sub>SO<sub>4</sub> and 1 M KOH.

| Materials | 0.5 M H <sub>2</sub> SO <sub>4</sub> |                  | 1 M KOH    |                  |
|-----------|--------------------------------------|------------------|------------|------------------|
|           | Onset (mV)                           | $\eta_{10}$ (mV) | Onset (mV) | $\eta_{10}$ (mV) |
| 0:1       | 124.3                                | 210.8            | 227.4      | 307.1            |
| 0.5:1     | 114.2                                | 215.4            | 269.4      | 413.2            |
| 1:1       | 42.7                                 | 110.3            | 142.3      | 239.4            |
| 1.5:1     | 135.7                                | 320.0            | 251.3      | 404.0            |

341

342

343

344

345

346

347

348

349

350

351

352

353

354

355

356

357

358

359

360



361

362 Table S2. Electrocatalytic performance of catalysts with different calcination temperatures in

363

0.5 M H<sub>2</sub>SO<sub>4</sub> and 1 M KOH.

| Temperature<br>(°C) | 0.5 M H <sub>2</sub> SO <sub>4</sub> |                  | 1 M KOH    |                  |
|---------------------|--------------------------------------|------------------|------------|------------------|
|                     | Onset (mV)                           | $\eta_{10}$ (mV) | Onset (mV) | $\eta_{10}$ (mV) |
| 500                 | 498.7                                | -                | 488.8      | 583.2            |
| 600                 | 114.0                                | 206.3            | 303.1      | 508.7            |
| 700                 | 45.6                                 | 275.7            | 2965       | 503.4            |
| 800                 | 42.7                                 | 110.3            | 145.2      | 239.4            |
| 900                 | 114.2                                | 231.3            | 275.1      | 469.0            |

364

365

366

367

368

369

370

371

372

373

374

375

376

377

378

379

380

381

382

383

384 Table S3. Electrocatalytic performance of catalysts with different calcination times in 0.5 M

385

H<sub>2</sub>SO<sub>4</sub> and 1 M KOH.

| Time | 0.5 M H <sub>2</sub> SO <sub>4</sub> |                      | 1 M KOH        |                      |
|------|--------------------------------------|----------------------|----------------|----------------------|
|      | Onset (mV<br>)                       | $\eta_{10}$ (mV<br>) | Onset (mV<br>) | $\eta_{10}$ (mV<br>) |
| 1 h  | 70.8                                 | 147.1                | 177.8          | 267.8                |
| 2 h  | 24.2                                 | 86.7                 | 132.4          | 233.5                |
| 3 h  | 85.7                                 | 169.8                | 221.1          | 320.1                |

386

387

388

389

390

391

392

393

394

395

396

397

398

399

400

401

402

403

404

405

406

407

408 Table S4. Electrocatalytic performance of catalysts with different ratios of mass ratio about  
 409 sodium hypophosphite to the as-prepared FeCoNi-MOF-100@NCNTs in 0.5 M H<sub>2</sub>SO<sub>4</sub> and 1 M

410

KOH.

| Materials | 0.5 M H <sub>2</sub> SO <sub>4</sub> |                  | 1 M KOH     |                  |
|-----------|--------------------------------------|------------------|-------------|------------------|
|           | Onset (mV )                          | $\eta_{10}$ (mV) | Onset (mV ) | $\eta_{10}$ (mV) |
| 10:1      | 24.2                                 | 86.7             | 130.5       | 233.5            |
| 20:1      | 75.4                                 | 149.3            | 192.9       | 320.3            |
| 30:1      | 235.8                                | 441.7            | 376.0       | 556.5            |

411

412

413

414

415

416

417

418

419

420

421

422

423

424

425

426

427

428

429

430

431

432

433

434

435

436

437  
438  
439  
440  
441

442 Table S5. Comparison of the HER performances of the related electrocatalysts reported recently.

| Catalyst                                    | Electrolyte                          | $\eta_{10}$ / mV | Tafel/<br>mV dec <sup>-1</sup> | Stability                                                                                                                                                                          | References |
|---------------------------------------------|--------------------------------------|------------------|--------------------------------|------------------------------------------------------------------------------------------------------------------------------------------------------------------------------------|------------|
| NCP@FeP <sub>x</sub>                        | 0.5 M H <sub>2</sub> SO <sub>4</sub> | 96               | 50.16                          | a little attenuation after<br>2000 and 4000 cycles<br>a negligible change after<br>5000 cycles                                                                                     | 1          |
| MoO <sub>2</sub> -FeP@C                     | 0.5 M H <sub>2</sub> SO <sub>4</sub> | 103              | 48                             | very little attenuation after<br>24 h i-t test                                                                                                                                     | 2          |
| FeP/MoS <sub>2</sub>                        | 0.5 M H <sub>2</sub> SO <sub>4</sub> | 110              | 67.8                           | A negligible current decay<br>at 30 mA cm <sup>-2</sup> after 45 h i-t<br>test<br>A negligible degradation<br>after 5000 cycles                                                    | 3          |
| FeP/NCNSs                                   | 0.5 M H <sub>2</sub> SO <sub>4</sub> | 114              | 64                             | Insignificant fluctuations at<br>10 mA cm <sup>-2</sup> after 20 h i-t<br>test<br>No significant overpotential<br>changes at 50 and 100 mA<br>cm <sup>-2</sup> after 50 h i-t test | 4          |
| Co(OH) <sub>2</sub> /Ag/FeP                 | 0.5 M H <sub>2</sub> SO <sub>4</sub> | 118              | 79                             | A slight degradation at 10<br>mA cm <sup>-2</sup> after 4000s i-t test                                                                                                             | 5          |
| NiPCM-101-450                               | 0.5 M H <sub>2</sub> SO <sub>4</sub> | 120              | 60.9                           | Significant current decay at<br>10 mA cm <sup>-2</sup> after 1 h i-t test                                                                                                          | 6          |
| Co-FeP NPs                                  | 0.5 M H <sub>2</sub> SO <sub>4</sub> | 126              | 63.6                           | Negligible current decay at<br>10 mA cm <sup>-2</sup> after 1000<br>cycles                                                                                                         | 7          |
| La-MoP@NC                                   |                                      | 129.3            | 57.9                           | A negligible current decay<br>at 10 mA cm <sup>-2</sup> after 12 h i-t<br>test                                                                                                     |            |
|                                             | 0.5 M H <sub>2</sub> SO <sub>4</sub> |                  |                                | Negligible current decay at<br>10 mA cm <sup>-2</sup> after 1000<br>cycles                                                                                                         | 8          |
| Yb-MoP@NC                                   |                                      | 136.5            | 70.8                           | Significant current decay at<br>10 mA cm <sup>-2</sup> after 12 h i-t<br>test                                                                                                      |            |
| Fe <sub>0.14</sub> Co <sub>0.86</sub> -P/CC | 0.5 M H <sub>2</sub> SO <sub>4</sub> | 130              | 45.4                           | Negligible current decay<br>after 2000 cycles                                                                                                                                      | 9          |

|                        |                                      |      |       |                                                                                                                        |           |
|------------------------|--------------------------------------|------|-------|------------------------------------------------------------------------------------------------------------------------|-----------|
| CoP/NCNHP              | 0.5 M H <sub>2</sub> SO <sub>4</sub> | 140  | 53    | A weak decay after 1000 cycles<br>Significant current decay at 10 mA cm <sup>-2</sup> after 24 h i-t test              | 10        |
| Ni <sub>2</sub> P/Ni@C | 0.5 M H <sub>2</sub> SO <sub>4</sub> | 149  | 61.2  | Negligible current decay after 1000 cycles<br>89.0% retain at 10 mA cm <sup>-2</sup> after 8 h i-t test                | 11        |
| CoP-InNC@CNT           | 0.5 M H <sub>2</sub> SO <sub>4</sub> | 153  | 62    | 93.6 % retain at 10 mA cm <sup>-2</sup> after 20 h i-t test                                                            | 12        |
| NiFeP@C                | 0.5 M H <sub>2</sub> SO <sub>4</sub> | 160  | 75.8  | Significant current decay after 3000 cycles<br>Significant current decay at 20 mA cm <sup>-2</sup> after 30 h i-t test | 13        |
| Co/Ni-MOFs@P           | 0.5 M H <sub>2</sub> SO <sub>4</sub> | 194  | 58.3  | No significant overpotential changes at 10 mA cm <sup>-2</sup> within 2000 min i-t test                                | 14        |
| FeCoNiP@NCNTs          | 0.5 M H <sub>2</sub> SO <sub>4</sub> | 86.7 | 59.39 | Without any obvious variation at 10 mA cm <sup>-2</sup> after 20 h i-t test                                            | This work |

443

444

445

446

447

448

449

450

451

452

453

454 Table S6. Raw data of Bader charge analysis of FeP (002) with optimal hydrogen adsorption site.  
455

| Atom | x        | y       | z        | Charge  |
|------|----------|---------|----------|---------|
| 1    | 6.75244  | 6.70697 | 10.90443 | 1.377   |
| 2    | 2.52588  | 1.73281 | 1.99991  | 7.73008 |
| 3    | 2.52588  | 1.73281 | 5.01059  | 7.778   |
| 4    | 2.55046  | 1.71325 | 8.05959  | 7.76482 |
| 5    | 2.5078   | 4.03417 | 3.50536  | 7.77817 |
| 6    | 2.5078   | 4.03417 | 6.51604  | 7.76427 |
| 7    | 2.52254  | 4.02251 | 9.27326  | 7.80896 |
| 8    | 5.0625   | 4.59506 | 3.50536  | 7.77798 |
| 9    | 5.0625   | 4.59506 | 6.51604  | 7.76454 |
| 10   | 5.04377  | 4.58508 | 9.28459  | 7.79872 |
| 11   | 5.08058  | 1.17192 | 1.99991  | 7.72986 |
| 12   | 5.08058  | 1.17192 | 5.01059  | 7.77662 |
| 13   | 5.10654  | 1.18432 | 8.04265  | 7.77062 |
| 14   | 7.63528  | 1.73281 | 1.99991  | 7.72973 |
| 15   | 7.63528  | 1.73281 | 5.01059  | 7.7782  |
| 16   | 7.65894  | 1.71313 | 8.07015  | 7.76591 |
| 17   | 7.6172   | 4.03417 | 3.50536  | 7.77801 |
| 18   | 7.6172   | 4.03417 | 6.51604  | 7.76254 |
| 19   | 7.61027  | 4.05503 | 9.25965  | 7.80763 |
| 20   | 10.1719  | 4.59506 | 3.50536  | 7.7781  |
| 21   | 10.1719  | 4.59506 | 6.51604  | 7.76567 |
| 22   | 10.16502 | 4.6115  | 9.30092  | 7.80057 |
| 23   | 10.18998 | 1.17192 | 1.99991  | 7.72988 |
| 24   | 10.18998 | 1.17192 | 5.01059  | 7.77665 |
| 25   | 10.21584 | 1.19145 | 8.05562  | 7.76572 |

---

|    |          |          |         |         |
|----|----------|----------|---------|---------|
| 26 | 2.52588  | 7.45731  | 1.99991 | 7.73022 |
| 27 | 2.52588  | 7.45731  | 5.01059 | 7.77749 |
| 28 | 2.55578  | 7.44133  | 8.05673 | 7.76687 |
| 29 | 2.5078   | 9.75867  | 3.50536 | 7.77848 |
| 30 | 2.5078   | 9.75867  | 6.51604 | 7.76357 |
| 31 | 2.50678  | 9.75156  | 9.29229 | 7.80414 |
| 32 | 5.0625   | 10.31956 | 3.50536 | 7.77825 |
| 33 | 5.0625   | 10.31956 | 6.51604 | 7.76364 |
| 34 | 5.05744  | 10.32092 | 9.29076 | 7.80438 |
| 35 | 5.08058  | 6.89642  | 1.99991 | 7.72986 |
| 36 | 5.08058  | 6.89642  | 5.01059 | 7.77705 |
| 37 | 5.11194  | 6.90777  | 8.06984 | 7.76818 |
| 38 | 7.63528  | 7.45731  | 1.99991 | 7.72992 |
| 39 | 7.63528  | 7.45731  | 5.01059 | 7.77601 |
| 40 | 7.66554  | 7.4428   | 8.01298 | 7.77324 |
| 41 | 7.6172   | 9.75867  | 3.50536 | 7.77853 |
| 42 | 7.6172   | 9.75867  | 6.51604 | 7.76239 |
| 43 | 7.61403  | 9.74725  | 9.27253 | 7.81144 |
| 44 | 10.1719  | 10.31956 | 3.50536 | 7.77811 |
| 45 | 10.1719  | 10.31956 | 6.51604 | 7.76284 |
| 46 | 10.16506 | 10.31526 | 9.28869 | 7.80329 |
| 47 | 10.18998 | 6.89642  | 1.99991 | 7.72977 |
| 48 | 10.18998 | 6.89642  | 5.01059 | 7.77703 |
| 49 | 0.00604  | 6.91112  | 8.0411  | 7.77342 |
| 50 | 3.48308  | 5.36672  | 1.99991 | 5.2632  |
| 51 | 3.48308  | 5.36672  | 5.01059 | 5.231   |
| 52 | 3.4852   | 5.42635  | 8.03553 | 5.1803  |
| 53 | 1.5505   | 0.40014  | 3.50536 | 5.21912 |
| 54 | 1.5505   | 0.40014  | 6.51604 | 5.22964 |
| 55 | 1.58972  | 0.2804   | 9.5534  | 5.24262 |
| 56 | 4.1052   | 2.50447  | 3.50536 | 5.21921 |

---

---

|    |         |          |         |         |
|----|---------|----------|---------|---------|
| 57 | 4.1052  | 2.50447  | 6.51604 | 5.22844 |
| 58 | 4.15664 | 2.60125  | 9.58935 | 5.25354 |
| 59 | 0.92838 | 3.26239  | 1.99991 | 5.2632  |
| 60 | 0.92838 | 3.26239  | 5.01059 | 5.2312  |
| 61 | 0.92642 | 3.21044  | 8.052   | 5.18996 |
| 62 | 8.59248 | 5.36672  | 1.99991 | 5.26387 |
| 63 | 8.59248 | 5.36672  | 5.01059 | 5.23133 |
| 64 | 8.60739 | 5.43419  | 8.03292 | 5.17069 |
| 65 | 6.6599  | 0.40014  | 3.50536 | 5.21914 |
| 66 | 6.6599  | 0.40014  | 6.51604 | 5.23083 |
| 67 | 6.71077 | 0.27283  | 9.5581  | 5.23933 |
| 68 | 9.2146  | 2.50447  | 3.50536 | 5.21952 |
| 69 | 9.2146  | 2.50447  | 6.51604 | 5.22846 |
| 70 | 9.22767 | 2.63447  | 9.55112 | 5.24374 |
| 71 | 6.03778 | 3.26239  | 1.99991 | 5.26329 |
| 72 | 6.03778 | 3.26239  | 5.01059 | 5.23133 |
| 73 | 6.03767 | 3.20053  | 8.04571 | 5.18549 |
| 74 | 3.48308 | 11.09122 | 1.99991 | 5.26321 |
| 75 | 3.48308 | 11.09122 | 5.01059 | 5.2309  |
| 76 | 3.48485 | 11.14735 | 8.04632 | 5.18275 |
| 77 | 1.5505  | 6.12464  | 3.50536 | 5.21907 |
| 78 | 1.5505  | 6.12464  | 6.51604 | 5.22918 |
| 79 | 1.60696 | 5.99631  | 9.56432 | 5.24106 |
| 80 | 4.1052  | 8.22897  | 3.50536 | 5.21906 |
| 81 | 4.1052  | 8.22897  | 6.51604 | 5.23241 |
| 82 | 4.15597 | 8.34018  | 9.56196 | 5.24511 |
| 83 | 0.92838 | 8.98689  | 1.99991 | 5.26303 |
| 84 | 0.92838 | 8.98689  | 5.01059 | 5.23023 |
| 85 | 0.936   | 8.92991  | 8.04519 | 5.18282 |
| 86 | 8.59248 | 11.09122 | 1.99991 | 5.26305 |
| 87 | 8.59248 | 11.09122 | 5.01059 | 5.2308  |

---



---

|    |         |          |         |         |
|----|---------|----------|---------|---------|
| 88 | 8.59846 | 11.14959 | 8.04456 | 5.18208 |
| 89 | 6.6599  | 6.12464  | 3.50536 | 5.21956 |
| 90 | 6.6599  | 6.12464  | 6.51604 | 5.23298 |
| 91 | 6.67135 | 6.06331  | 9.63017 | 4.83675 |
| 92 | 9.2146  | 8.22897  | 3.50536 | 5.21939 |
| 93 | 9.2146  | 8.22897  | 6.51604 | 5.22872 |
| 94 | 9.25144 | 8.33109  | 9.5372  | 5.24888 |
| 95 | 6.03778 | 8.98689  | 1.99991 | 5.26322 |
| 96 | 6.03778 | 8.98689  | 5.01059 | 5.2289  |
| 97 | 6.03769 | 8.92714  | 8.04294 | 5.18111 |

---

456

457

458

459

460

461

462

463

464

465

466

467

468

470 Table S7. Raw data of Bader charge analysis of Co/Ni doped FeP (002) with optimal hydrogen  
 471 adsorption site.

| Atom | x        | y       | z        | Charge  |
|------|----------|---------|----------|---------|
| 1    | 3.70008  | 4.8266  | 10.42497 | 1.1832  |
| 2    | 2.52588  | 1.73281 | 1.99991  | 7.72973 |
| 3    | 2.52588  | 1.73281 | 5.01059  | 7.77863 |
| 4    | 2.56481  | 1.7576  | 8.13125  | 7.75406 |
| 5    | 2.5078   | 4.03417 | 3.50536  | 7.77755 |
| 6    | 2.5078   | 4.03417 | 6.51604  | 7.77554 |
| 7    | 5.0625   | 4.59506 | 3.50536  | 7.77787 |
| 8    | 5.0625   | 4.59506 | 6.51604  | 7.76347 |
| 9    | 4.99687  | 4.61738 | 9.3924   | 7.73286 |
| 10   | 5.08058  | 1.17192 | 1.99991  | 7.7292  |
| 11   | 5.08058  | 1.17192 | 5.01059  | 7.77514 |
| 12   | 5.10692  | 1.1821  | 8.02517  | 7.78469 |
| 13   | 7.63528  | 1.73281 | 1.99991  | 7.73008 |
| 14   | 7.63528  | 1.73281 | 5.01059  | 7.77713 |
| 15   | 7.65663  | 1.72828 | 8.08883  | 7.75983 |
| 16   | 7.6172   | 4.03417 | 3.50536  | 7.77815 |
| 17   | 7.6172   | 4.03417 | 6.51604  | 7.75797 |
| 18   | 10.1719  | 4.59506 | 3.50536  | 7.77821 |
| 19   | 10.1719  | 4.59506 | 6.51604  | 7.75644 |
| 20   | 10.16027 | 4.62181 | 9.31725  | 7.80031 |
| 21   | 10.18998 | 1.17192 | 1.99991  | 7.72898 |
| 22   | 10.18998 | 1.17192 | 5.01059  | 7.77603 |
| 23   | 0.00968  | 1.20723 | 8.0634   | 7.76136 |
| 24   | 2.52588  | 7.45731 | 1.99991  | 7.72988 |
| 25   | 2.52588  | 7.45731 | 5.01059  | 7.7771  |

---

|    |          |          |         |         |
|----|----------|----------|---------|---------|
| 26 | 2.53901  | 7.39648  | 8.10442 | 7.75612 |
| 27 | 2.5078   | 9.75867  | 3.50536 | 7.77816 |
| 28 | 2.5078   | 9.75867  | 6.51604 | 7.76111 |
| 29 | 2.50381  | 9.75581  | 9.28452 | 7.80573 |
| 30 | 5.0625   | 10.31956 | 3.50536 | 7.77847 |
| 31 | 5.0625   | 10.31956 | 6.51604 | 7.76314 |
| 32 | 5.06115  | 10.3259  | 9.27999 | 7.80603 |
| 33 | 5.08058  | 6.89642  | 1.99991 | 7.72927 |
| 34 | 5.08058  | 6.89642  | 5.01059 | 7.77624 |
| 35 | 5.08956  | 6.90652  | 8.06441 | 7.76711 |
| 36 | 7.63528  | 7.45731  | 1.99991 | 7.72912 |
| 37 | 7.63528  | 7.45731  | 5.01059 | 7.77717 |
| 38 | 7.64244  | 7.41982  | 8.0866  | 7.76246 |
| 39 | 7.6172   | 9.75867  | 3.50536 | 7.7783  |
| 40 | 7.6172   | 9.75867  | 6.51604 | 7.76133 |
| 41 | 7.61884  | 9.75594  | 9.26756 | 7.81265 |
| 42 | 10.1719  | 10.31956 | 3.50536 | 7.7783  |
| 43 | 10.1719  | 10.31956 | 6.51604 | 7.76184 |
| 44 | 10.17057 | 10.32377 | 9.28285 | 7.80383 |
| 45 | 10.18998 | 6.89642  | 1.99991 | 7.7294  |
| 46 | 10.18998 | 6.89642  | 5.01059 | 7.77541 |
| 47 | 10.19842 | 6.90937  | 8.05623 | 7.78493 |
| 48 | 2.53842  | 4.09911  | 9.49721 | 9.84573 |
| 49 | 3.48308  | 5.36672  | 1.99991 | 5.26374 |
| 50 | 3.48308  | 5.36672  | 5.01059 | 5.22961 |
| 51 | 3.48177  | 5.39265  | 8.0181  | 5.13272 |
| 52 | 1.5505   | 0.40014  | 3.50536 | 5.21949 |
| 53 | 1.5505   | 0.40014  | 6.51604 | 5.24014 |
| 54 | 1.58707  | 0.27866  | 9.57502 | 5.25021 |
| 55 | 4.1052   | 2.50447  | 3.50536 | 5.21939 |
| 56 | 4.1052   | 2.50447  | 6.51604 | 5.22799 |

---

---

|    |         |          |         |         |
|----|---------|----------|---------|---------|
| 57 | 4.19502 | 2.54196  | 9.54912 | 5.15132 |
| 58 | 0.92838 | 3.26239  | 1.99991 | 5.26356 |
| 59 | 0.92838 | 3.26239  | 5.01059 | 5.23459 |
| 60 | 0.97071 | 3.25104  | 8.08953 | 5.1846  |
| 61 | 8.59248 | 5.36672  | 1.99991 | 5.26286 |
| 62 | 8.59248 | 5.36672  | 5.01059 | 5.22952 |
| 63 | 8.59634 | 5.41573  | 8.04294 | 5.1575  |
| 64 | 6.6599  | 0.40014  | 3.50536 | 5.21959 |
| 65 | 6.6599  | 0.40014  | 6.51604 | 5.23411 |
| 66 | 6.71097 | 0.27138  | 9.56403 | 5.23416 |
| 67 | 9.2146  | 2.50447  | 3.50536 | 5.21886 |
| 68 | 9.2146  | 2.50447  | 6.51604 | 5.23489 |
| 69 | 9.23781 | 2.6389   | 9.5386  | 5.2019  |
| 70 | 6.03778 | 3.26239  | 1.99991 | 5.26237 |
| 71 | 6.03778 | 3.26239  | 5.01059 | 5.2314  |
| 72 | 6.01479 | 3.21466  | 8.0636  | 5.19372 |
| 73 | 3.48308 | 11.09122 | 1.99991 | 5.26324 |
| 74 | 3.48308 | 11.09122 | 5.01059 | 5.22865 |
| 75 | 3.48351 | 11.15355 | 8.04866 | 5.1885  |
| 76 | 1.5505  | 6.12464  | 3.50536 | 5.21863 |
| 77 | 1.5505  | 6.12464  | 6.51604 | 5.22279 |
| 78 | 1.45386 | 6.12833  | 9.6506  | 5.19433 |
| 79 | 4.1052  | 8.22897  | 3.50536 | 5.22047 |
| 80 | 4.1052  | 8.22897  | 6.51604 | 5.23174 |
| 81 | 4.14234 | 8.35494  | 9.56581 | 5.23514 |
| 82 | 0.92838 | 8.98689  | 1.99991 | 5.26242 |
| 83 | 0.92838 | 8.98689  | 5.01059 | 5.232   |
| 84 | 0.93527 | 8.91925  | 8.05195 | 5.18281 |
| 85 | 8.59248 | 11.09122 | 1.99991 | 5.26244 |
| 86 | 8.59248 | 11.09122 | 5.01059 | 5.23043 |
| 87 | 8.60395 | 11.16223 | 8.04423 | 5.18634 |

---

---

|    |         |         |         |         |
|----|---------|---------|---------|---------|
| 88 | 6.6599  | 6.12464 | 3.50536 | 5.21912 |
| 89 | 6.6599  | 6.12464 | 6.51604 | 5.22964 |
| 90 | 6.6597  | 6.01756 | 9.58203 | 5.20074 |
| 91 | 9.2146  | 8.22897 | 3.50536 | 5.21957 |
| 92 | 9.2146  | 8.22897 | 6.51604 | 5.23259 |
| 93 | 9.25345 | 8.35444 | 9.56396 | 5.23436 |
| 94 | 6.03778 | 8.98689 | 1.99991 | 5.26265 |
| 95 | 6.03778 | 8.98689 | 5.01059 | 5.23169 |
| 96 | 6.03851 | 8.9205  | 8.04851 | 5.18178 |
| 97 | 7.58202 | 4.0453  | 9.27537 | 8.94465 |

---

472

473

474

475

476

477

478

479

480

481

482

483

485 **References**

- 486 [1] M. Li, X. Liu, X. Hu, Fabrication of core-sheath NiCoP@FeP<sub>x</sub> nanoarrays for  
487 efficient electrocatalytic hydrogen evolution, *ACS Sustain. Chem. Eng.*, 2018, **6**,  
488 8847-8855.
- 489 [2] G. Yang, Y. Jiao, H. Yan, Interfacial engineering of MoO<sub>2</sub>-FeP heterojunction for  
490 highly efficient hydrogen evolution coupled with biomass electrooxidation, *Adv.*  
491 *Mater.*, 2020, **32**, 2000455.
- 492 [3] M. H. Suliman, A. Adam, L. Li, FeP/MoS<sub>2</sub> enriched with dense catalytic sites and  
493 high electrical conductivity for the hydrogen evolution reaction, *ACS Sustain.*  
494 *Chem. Eng.*, 2019, **7**, 17671-17681.
- 495 [4] Y. Yu, Z. Peng, M. Asif, FeP nanocrystals embedded in N-doped carbon  
496 nanosheets for efficient electrocatalytic hydrogen generation over a broad pH range,  
497 *ACS Sustain. Chem. Eng.*, 2018, **6**, 11587-11594.
- 498 [5] X. Ding, Y. Xia, Q. Li, Interface engineering of Co(OH)<sub>2</sub>/Ag/FeP hierarchical  
499 superstructure as efficient and robust electrocatalyst for overall water splitting,  
500 *ACS Appl. Mater. Inter.*, 2019, **11**, 7936-7945.
- 501 [6] O. Mabayoje, S. G. Dunning, K. Kawashima, Hydrogen evolution by Ni<sub>2</sub>P  
502 catalysts derived from phosphine MOFs, *ACS Appl. Energ. Mater.*, 2019, **3**, 176-  
503 183.
- 504 [7] G. Cho, Y. Park, H. Kang, Transition metal-doped FeP nanoparticles for hydrogen  
505 evolution reaction catalysis, *Appl. Surf. Sci.*, 2020, **510**, 145427.
- 506 [8] P. Wei, X. Li, Z. He, Electron density modulation of MoP by rare earth metal as  
507 highly efficient electrocatalysts for pH-universal hydrogen evolution reaction, *Appl.*  
508 *Catal. B-Environ.*, 2021, **299**, 120657.
- 509 [9] H. Yu, L. Qi, Y. Hu, Nanowire-structured FeP-CoP arrays as highly active and  
510 stable bifunctional electrocatalyst synergistically promoting high-current overall  
511 water splitting, *J. Colloid. Interf. Sci.*, 2021, **600**, 811-819.
- 512 [10] Y. Pan, K. Sun, S. Liu, Core-shell ZIF-8@ZIF-67-derived CoP nanoparticle-  
513 embedded N-doped carbon nanotube hollow polyhedron for efficient overall water

- 514 splitting, *J. Am. Chem. Soc.*, 2018, **410**, 2610-2618.
- 515[11] X. Liu, W. Li, X. Zhao, Two birds with one stone: metal-organic framework  
516 derived micro-/nanostructured Ni<sub>2</sub>P/Ni hybrids embedded in porous carbon for  
517 electrocatalysis and energy storage, *Adv. Funct. Mater.*, 2019, **29**, 1901510.
- 518[12] L. Chai, Z. Hu, X. Wang, Stringing bimetallic metal-organic framework-derived  
519 cobalt phosphide composite for high-efficiency overall water splitting, *Adv. Sci.*,  
520 2020, **7**, 1903195.
- 521[13] Q. Kang, M. Li, J. Shi, A universal strategy for carbon-supported transition metal  
522 phosphides as high-performance bifunctional electrocatalysts towards efficient  
523 overall water splitting, *ACS Appl. Mater. Inter.*, 2020, **12**, 19447-19456.
- 524[14] P. Luo, Z. Pang, Z. Qin, Strategies for improving Co/Ni-based bimetal-organic  
525 framework to water splitting, *Int. J. Hydrogen Energ.*, 2020, **45**, 28240-28251.
